# Supplementary material for: Thermal decomposition of ammonium perchlorate-based molecular perovskite from TG-DSC-FTIR-MS and ab initio molecular dynamics
Source: Royal Society of Chemistry journal article supplement (doi:10.1039/d0ra10559g), 2021-01-01
Supplement: d0ra10559g1.pdf [file d0ra10559g1.pdf]

## ***Supporting Information***

### **Thermal decomposition of ammonium perchlorate-based molecular perovskite from TG-DSC-FTIR-MS and ab initio molecular dynamics**

Pengfei Zhai<sup>ab</sup>, Chengying Shi<sup>a</sup> and Shengxiang Zhao<sup>b</sup>,

(<sup>a</sup>Xi'an High-tech Research Institute, Xi'an 710025, People's Republic of China;

<sup>b</sup>Xi'an Modern Chemistry Research Institute, Xi'an 710065, People's Republic of China)

#### **Table of contents**

- Fig. S1. Identification of gas products.
- Fig. S2. Broadening of IR characteristic peaks induced by high temperature.
- Fig. S3. IR characteristic peaks of gas products for AP decomposed at 394.8 °C.
- Fig. S4. Overlap of IR characteristic peaks induced by high temperature for CO<sub>2</sub>, N<sub>2</sub>O and CO.
- Fig. S5. Evolution of product fragments from MS for DAP decomposed at the heating rate of 10 °C/min.
- Fig. S6 Evolution of key chemical species for AP decomposed at 3000 K.
- Fig. S7 Evolution of free radicals and potential energy for AP decomposed at 3000 K.

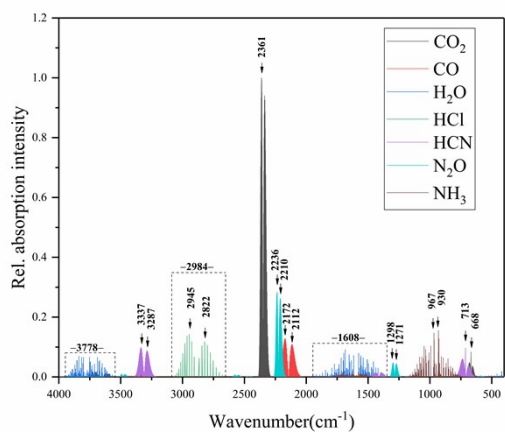

(a)

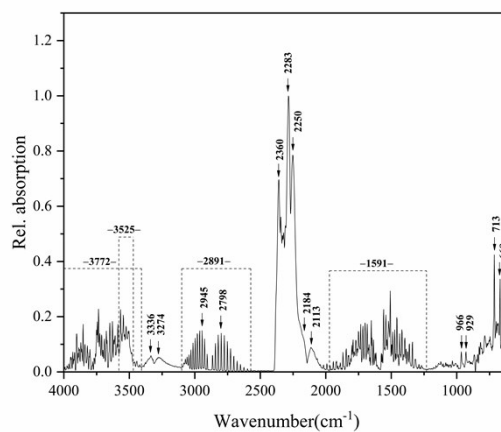

(b)

**Fig. S1** Identification of gas products. By comparing IR characteristic peaks of gas products for DAP decomposed at 381.8 °C (a) with the standard gas IR data obtained from HITRAN2016 molecular spectroscopic database<sup>1</sup> (b), the gas components can be clearly identified to include CO<sub>2</sub>, CO, H<sub>2</sub>O, HCl, HCN, NH<sub>3</sub>.

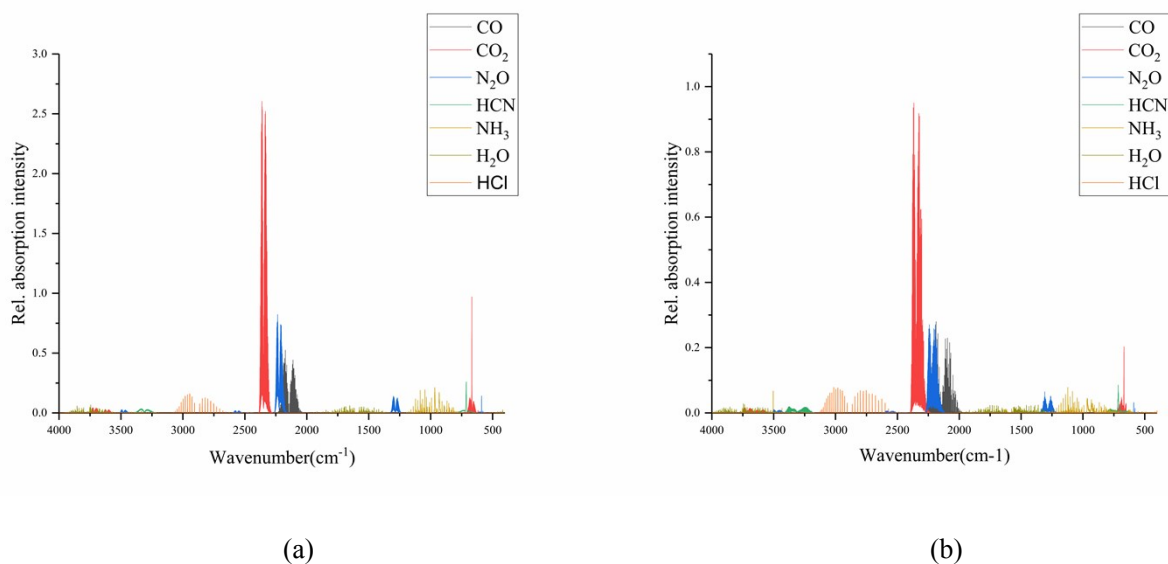

**Fig. S2** Broadening of IR characteristic peaks induced by high temperature. Compared with the IR characteristic peaks at 296 K (a), IR characteristic peaks at 655 K have been broadened, but the central locations are almost unchanged.

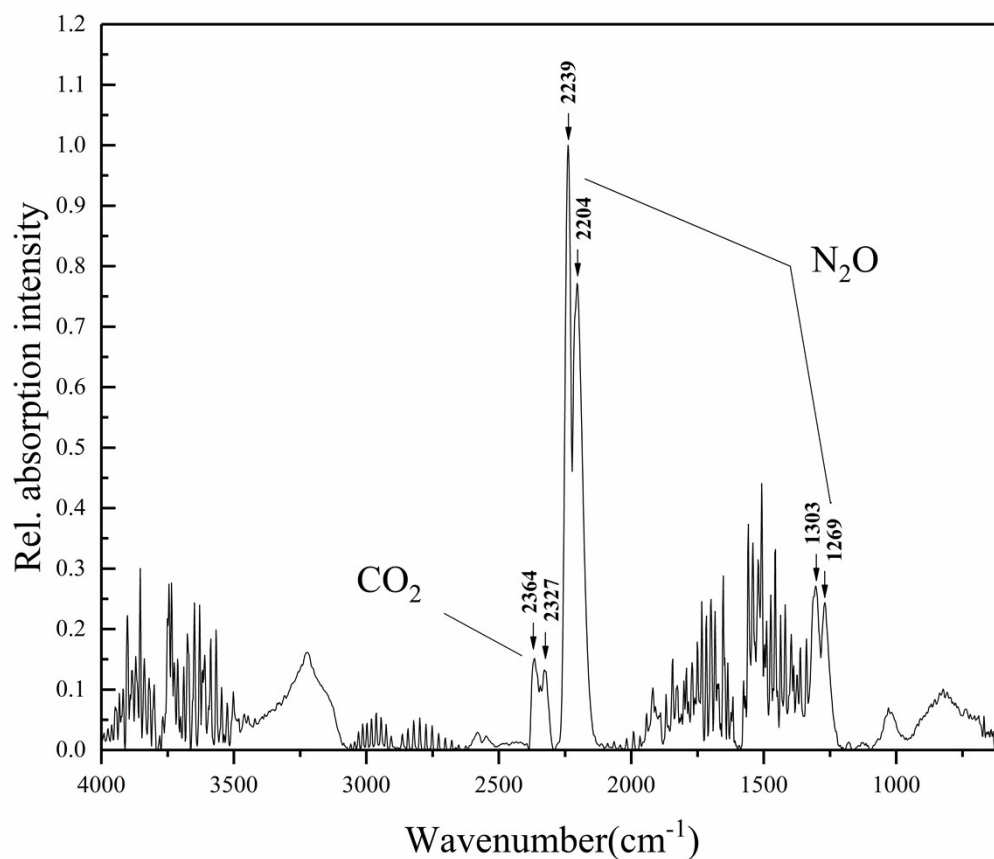

**Fig. S3** IR characteristic peaks of gas products for AP decomposed at 394.8 °C.<sup>2</sup> (Small amount of CO<sub>2</sub> comes from background gases)

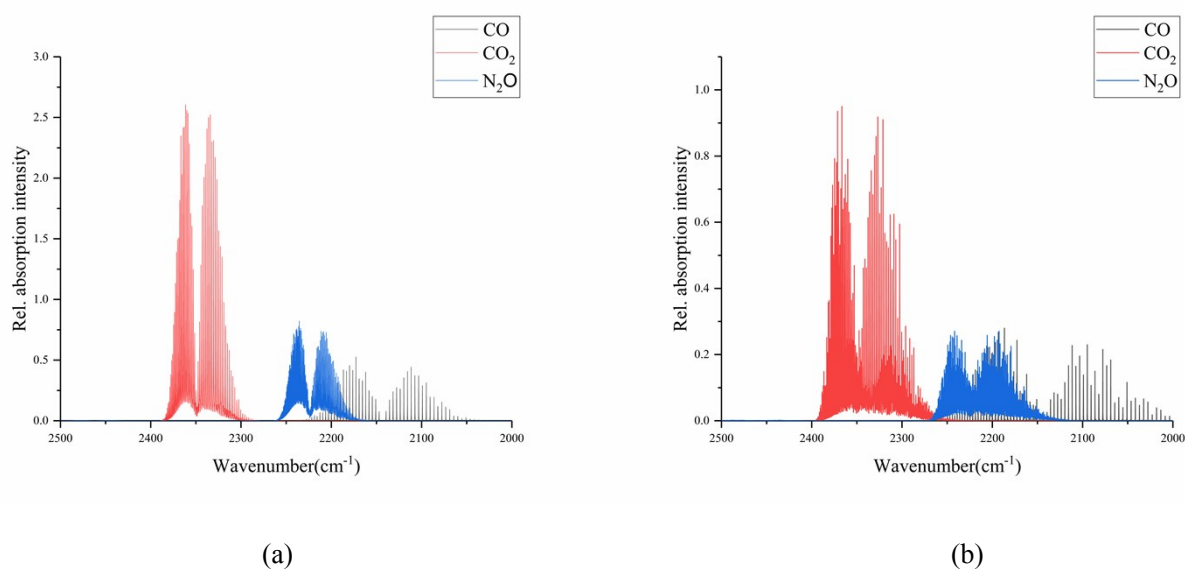

**Fig. S4** Overlap of IR characteristic peaks induced by high temperature for CO<sub>2</sub>, N<sub>2</sub>O and CO. The IR characteristic peaks of CO<sub>2</sub> and N<sub>2</sub>O are clearly not overlapped both at 296 K (a) and 655 K (b).

#### References:

- 1 P. Deng, H. Wang, X. Yang, H. Ren, Q. Jiao, J. Alloys Compd. 827 (2020) 154257.
- 2 I. E. Gordon, L. S. Rothman, C. Hill, et al., J. Quant. Spectrosc. Radiat. Transf., 2017, 203, 3–69.

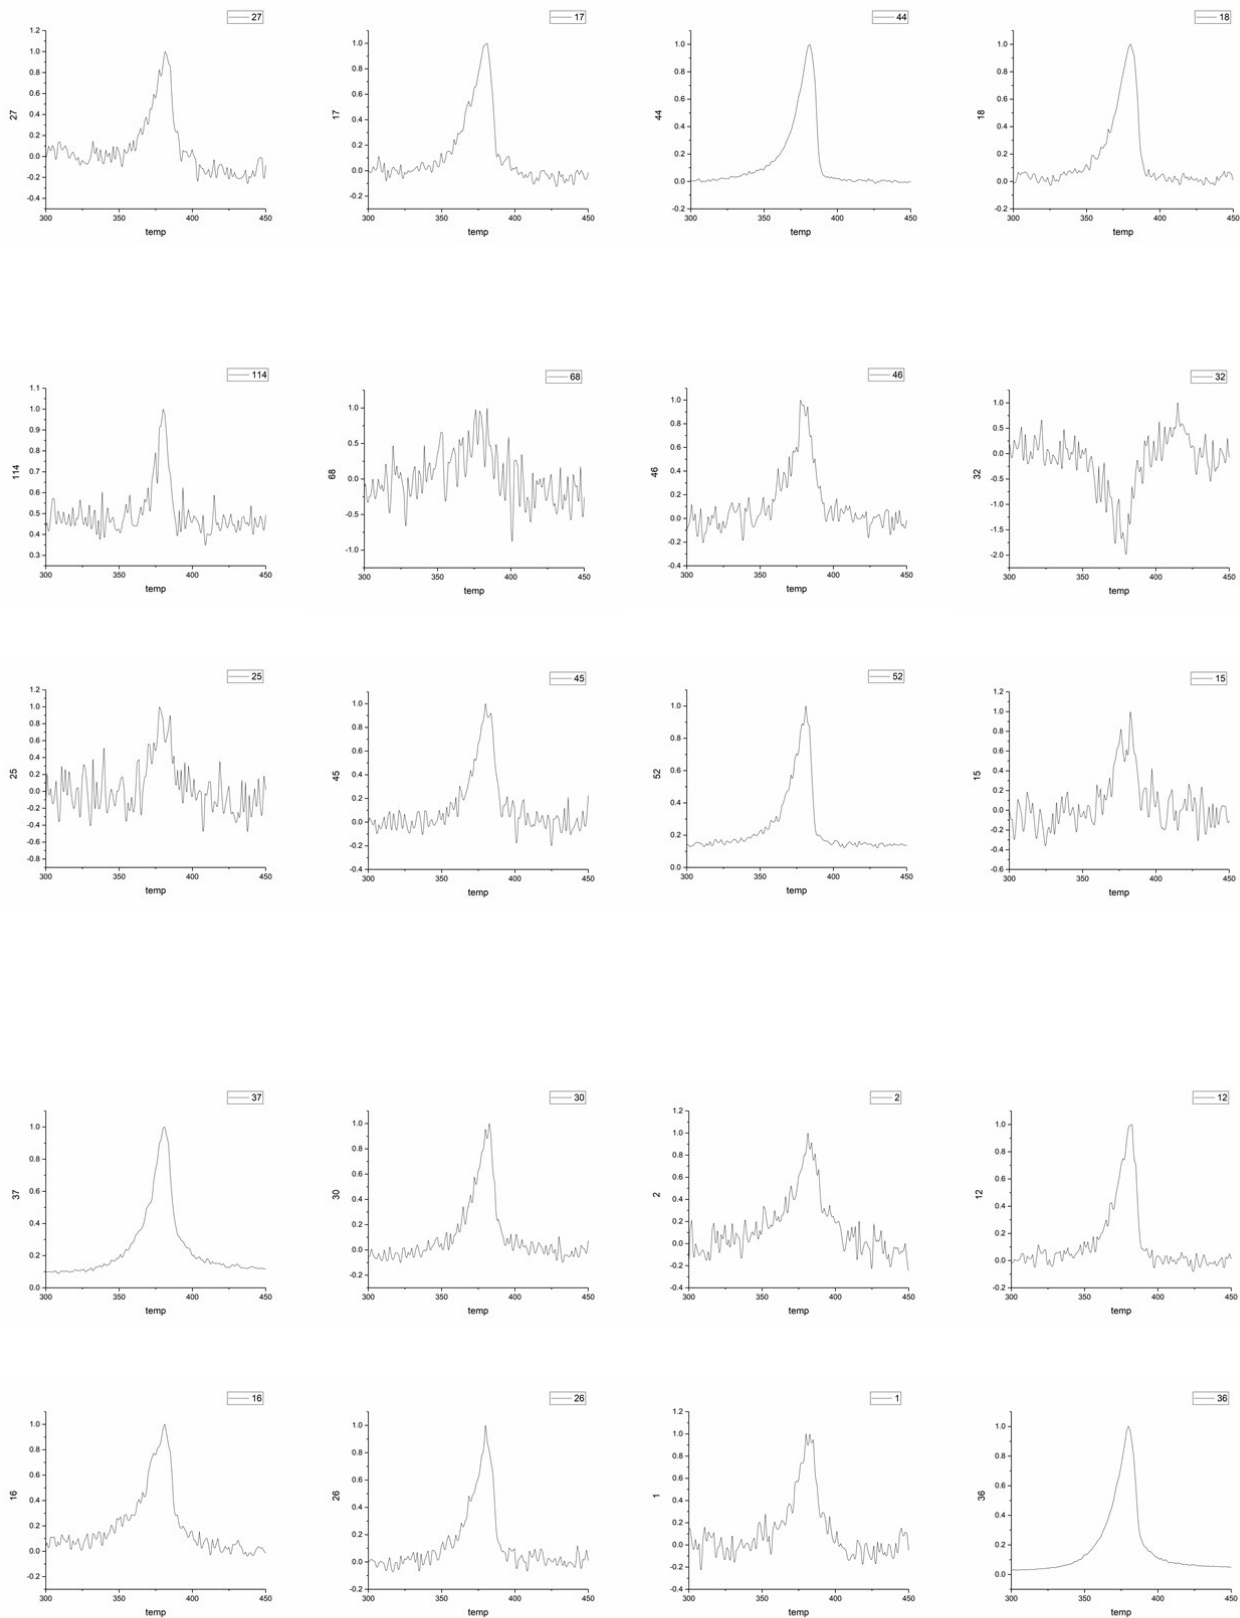

**Figure S5** Evolution of product fragments from MS for DAP decomposed at the heating rate of 10 °C/min.

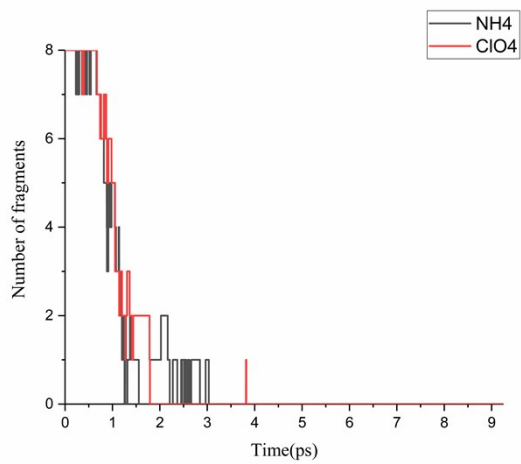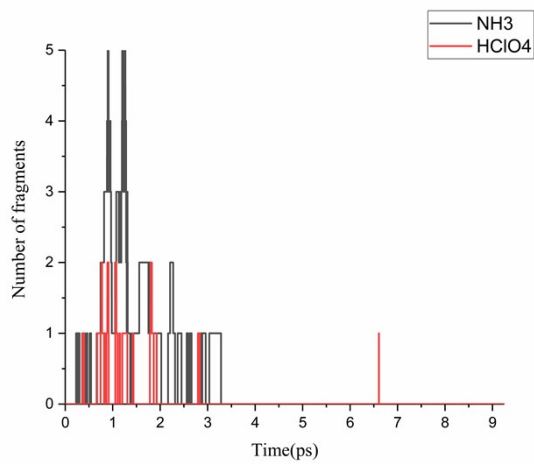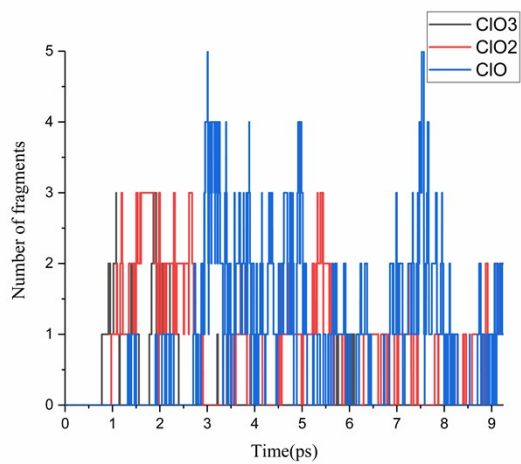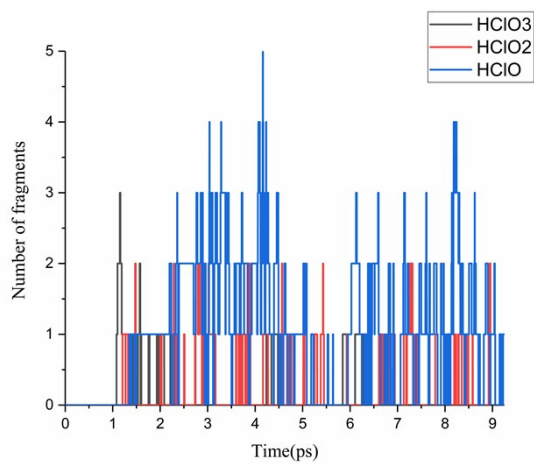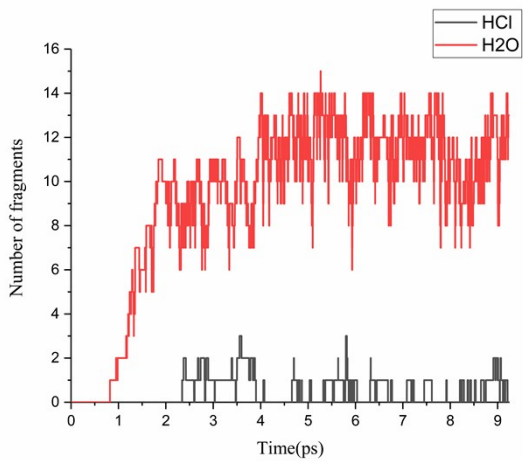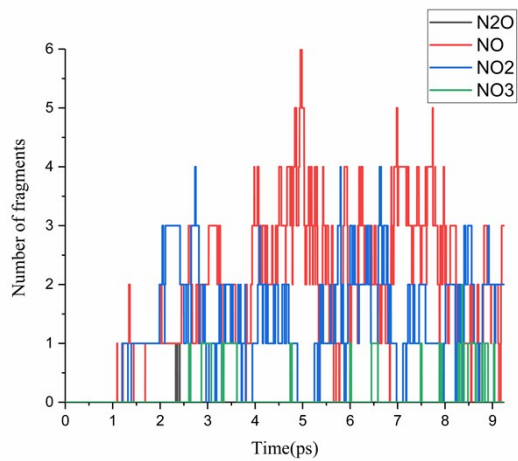

**Figure S6** Evolution of key chemical species for AP decomposed at 3000 K.

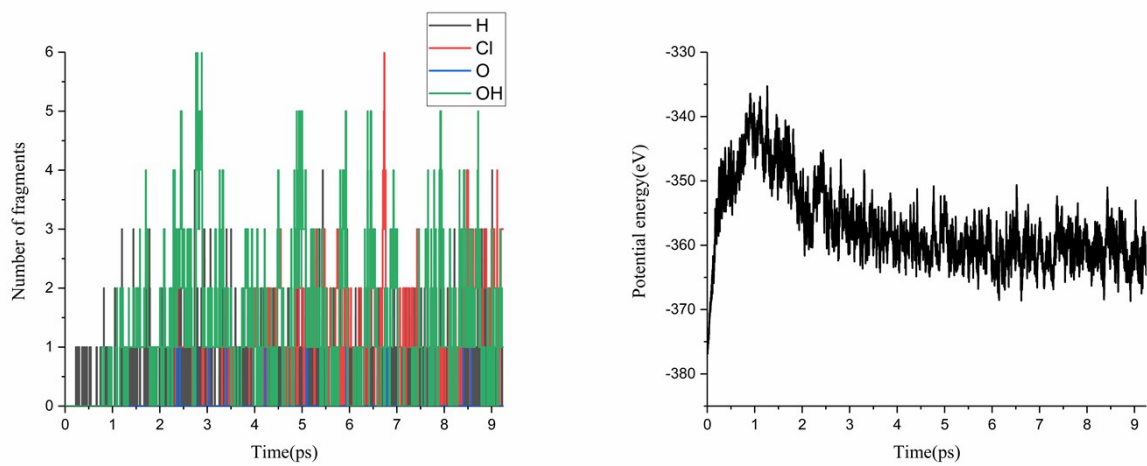

**Figure S7** Evolution of free radicals and potential energy for AP decomposed at 3000 K.
